# Supplementary material for: Whole-exome sequencing of rectal neuroendocrine tumors
Source: PubMed Central journal article supplement (PMC10450454; doi:10.1530/erc-22-0257), 2023-08-02

**a**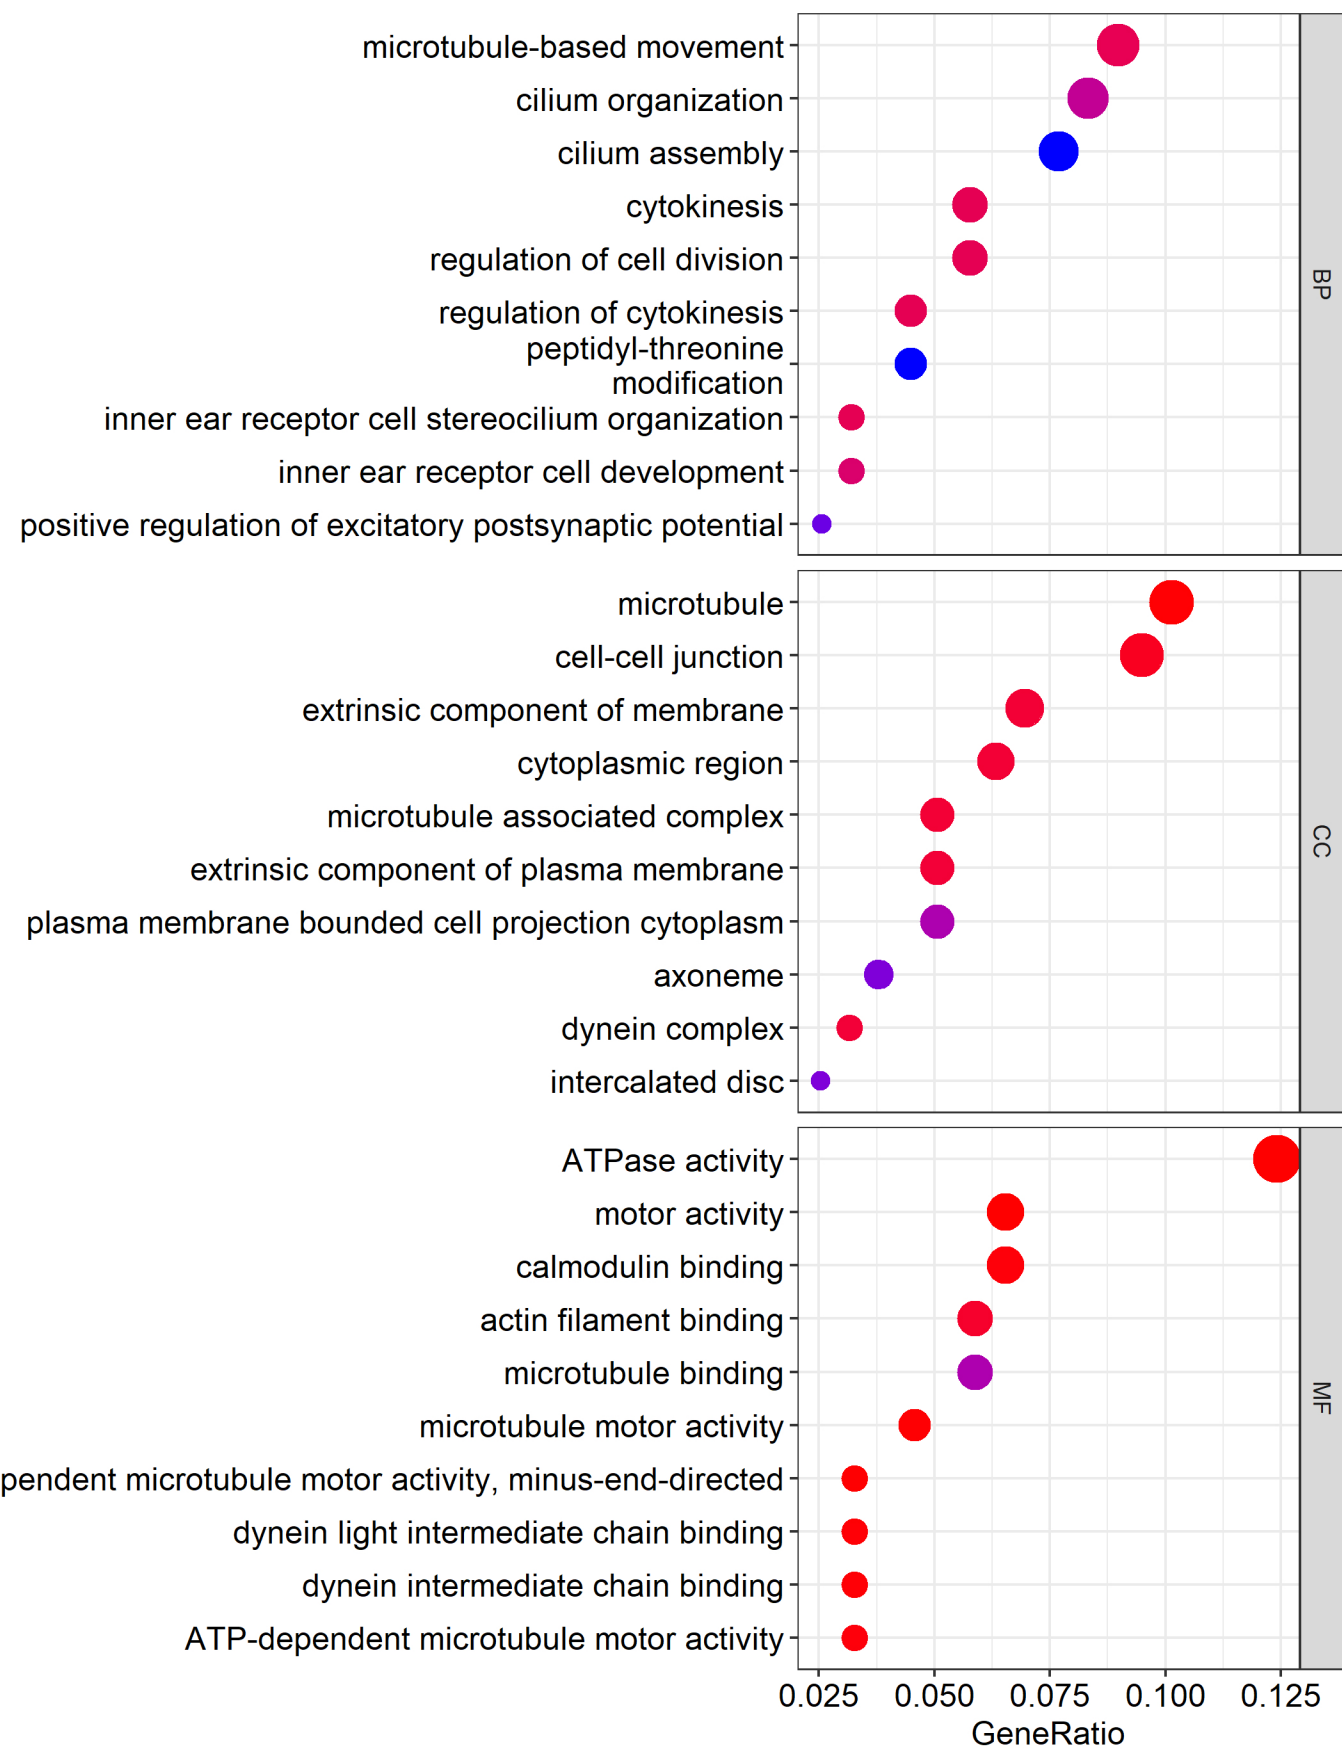**b**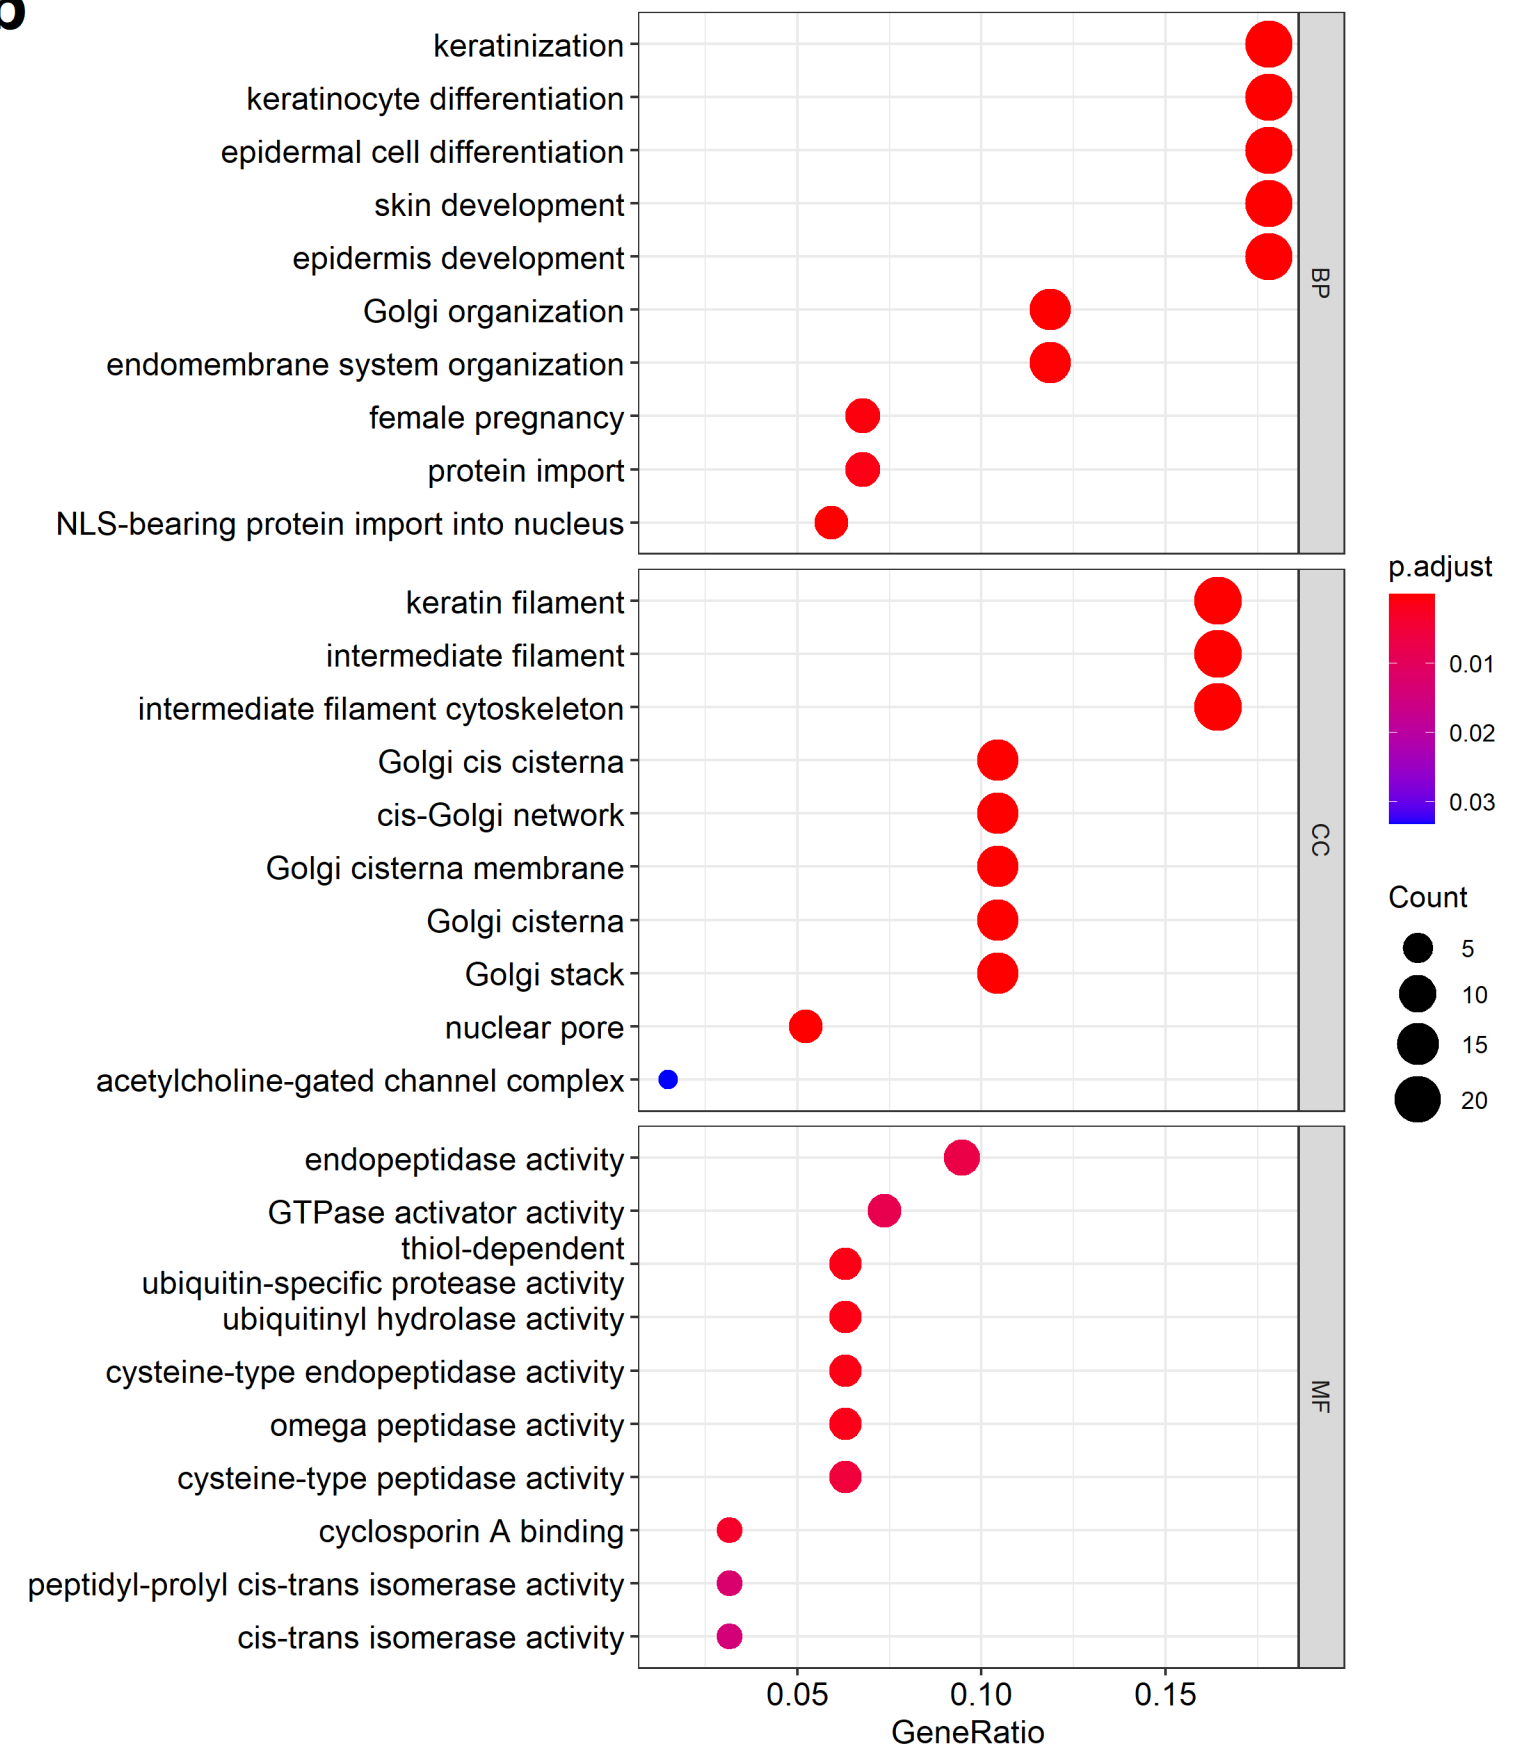

Supplement: supplementary_figure_2.pdf [file supplementary_figure_2.pdf]
