# Supplementary material for: Whole-exome sequencing of rectal neuroendocrine tumors
Source: PubMed Central journal article supplement (PMC10450454; doi:10.1530/erc-22-0257), 2023-08-02

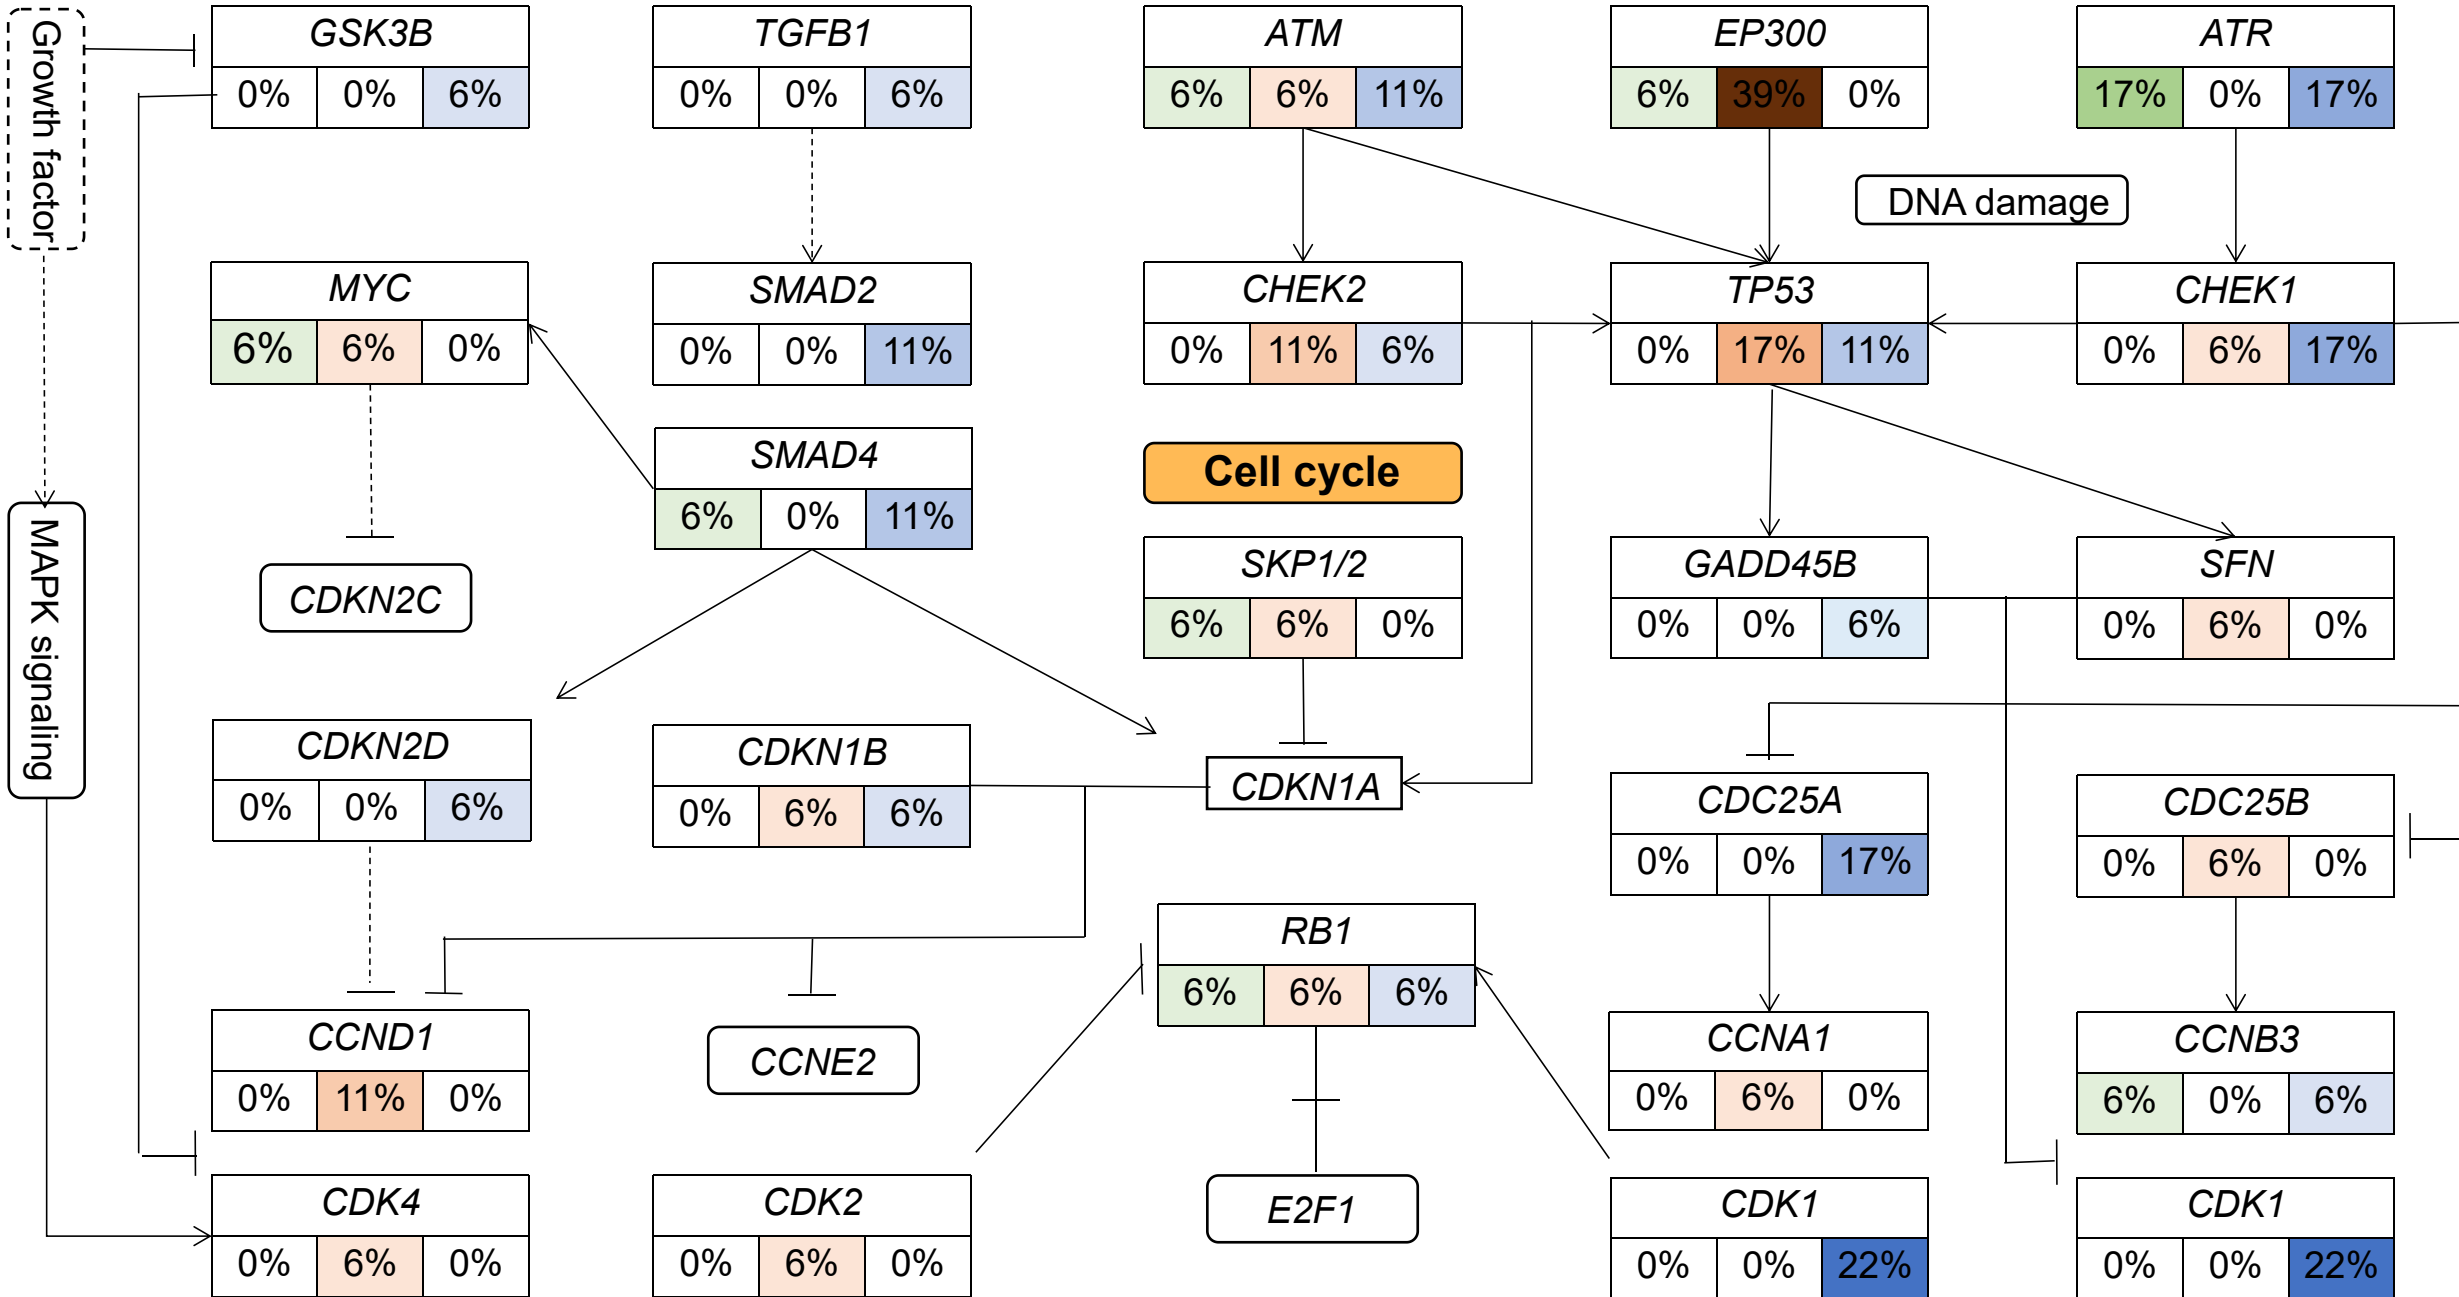

Supplement: supplementary_figure_5.pdf [file supplementary_figure_5.pdf]
