# Supplementary material for: Whole-exome sequencing of rectal neuroendocrine tumors
Source: PubMed Central journal article supplement (PMC10450454; doi:10.1530/erc-22-0257), 2023-08-02
Supplement: supplementary_figure_7.pdf [file supplementary_figure_7.pdf]

## Base excision repair

Short patch BER complex

|              |    |    |              |    |    |             |    |    |
|--------------|----|----|--------------|----|----|-------------|----|----|
| <i>APEX1</i> |    |    | <i>PARP1</i> |    |    |             |    |    |
| 0%           | 6% | 0% | 6%           | 0% | 0% | <i>LIG3</i> |    |    |
| <i>POLB</i>  |    |    | <i>XRCC1</i> |    |    | 0%          | 6% | 0% |
| 0%           | 0% | 0% | 0%           | 0% | 6% |             |    |    |

Long patch BER complex

|             |    |    |              |    |     |              |    |    |
|-------------|----|----|--------------|----|-----|--------------|----|----|
| <i>POLB</i> |    |    | <i>APEX1</i> |    |     | <i>FEN1</i>  |    |    |
| 0%          | 0% | 0% | 0%           | 6% | 0%  | 0%           | 0% | 6% |
| <i>LIG1</i> |    |    | <i>PCNA</i>  |    |     | <i>PARP1</i> |    |    |
| 6%          | 0% | 6% | 0%           | 0% | 0%  | 6%           | 0% | 0% |
|             |    |    | <i>POLD1</i> |    |     | <i>POLE</i>  |    |    |
|             |    |    | 0%           | 6% | 11% | 6%           | 6% | 6% |
