# Supplementary material for: Whole-exome sequencing of rectal neuroendocrine tumors
Source: PubMed Central journal article supplement (PMC10450454; doi:10.1530/erc-22-0257), 2023-08-02
Supplement: supplementary_figure_8.pdf [file supplementary_figure_8.pdf]

|              |     |    |                                   |    |     |
|--------------|-----|----|-----------------------------------|----|-----|
| <i>RBX1</i>  |     |    | <i>XPC</i>                        |    |     |
| 0%           | 22% | 0% | 0%                                | 6% | 11% |
| <i>CUL4A</i> |     |    | <i>RAD23A</i>                     |    |     |
| 0%           | 0%  | 0% | 0%                                | 6% | 6%  |
| <i>DDB1</i>  |     |    | <i>CETN2</i>                      |    |     |
| 0%           | 0%  | 0% | 0%                                | 0% | 0%  |
| <i>DDB2</i>  |     |    | <b>Nucleotide excision repair</b> |    |     |
| 6%           | 11% | 0% |                                   |    |     |

|              |     |    |              |    |     |
|--------------|-----|----|--------------|----|-----|
| <i>RBX1</i>  |     |    | <i>ERCC6</i> |    |     |
| 0%           | 22% | 0% | 17%          | 0% | 11% |
| <i>CUL4A</i> |     |    |              |    |     |
| 0%           | 6%  | 0% |              |    |     |
| <i>DDB1</i>  |     |    |              |    |     |
| 0%           | 0%  | 0% |              |    |     |
| <i>ERCC8</i> |     |    |              |    |     |
| 0%           | 0%  | 0% |              |    |     |

|              |    |     |
|--------------|----|-----|
| <i>POLD1</i> |    |     |
| 0%           | 6% | 11% |

|             |    |    |
|-------------|----|----|
| <i>POLE</i> |    |    |
| 6%          | 6% | 6% |

|                           |    |    |               |    |    |               |    |    |
|---------------------------|----|----|---------------|----|----|---------------|----|----|
| <i>CDK7</i>               |    |    | <i>ERCC3</i>  |    |    | <i>GTF2H1</i> |    |    |
| 0%                        | 0% | 0% | 0%            | 0% | 0% | 6%            | 0% | 0% |
| <i>MNAT1</i>              |    |    | <i>ERCC2</i>  |    |    | <i>GTF2H2</i> |    |    |
| 0%                        | 0% | 0% | 0%            | 0% | 6% | 0%            | 0% | 0% |
| <i>CCNH</i>               |    |    | <i>GTF2H5</i> |    |    | <i>GTF2H3</i> |    |    |
| 0%                        | 0% | 6% | 0%            | 0% | 0% | 0%            | 0% | 0% |
| <b>Holo-TFIIF complex</b> |    |    |               |    |    | <i>GTF2H4</i> |    |    |
|                           |    |    |               |    |    | 0%            | 0% | 6% |

|              |     |    |              |     |    |
|--------------|-----|----|--------------|-----|----|
| <i>ERCC5</i> |     |    | <i>XPA</i>   |     |    |
| 0%           | 17% | 0% | 0%           | 11% | 6% |
|              |     |    | <i>RPA1</i>  |     |    |
|              |     |    | 0%           | 6%  | 6% |
| <i>ERCC4</i> |     |    | <i>ERCC1</i> |     |    |
| 6%           | 0%  | 0% | 0%           | 6%  | 0% |

|             |    |    |
|-------------|----|----|
| <i>RFC1</i> |    |    |
| 6%          | 6% | 0% |
