# Supplementary material for: Whole-exome sequencing of rectal neuroendocrine tumors
Source: PubMed Central journal article supplement (PMC10450454; doi:10.1530/erc-22-0257), 2023-08-02
Supplement: supplementary_figure_9.pdf [file supplementary_figure_9.pdf]

|             |     |    |             |     |     |
|-------------|-----|----|-------------|-----|-----|
| <i>PMS2</i> |     |    | <i>MLH1</i> |     |     |
| 0%          | 11% | 0% | 0%          | 28% | 17% |
| <i>MSH6</i> |     |    | <i>MSH2</i> |     |     |
| 0%          | 11% | 0% | 6%          | 22% | 0%  |

|             |    |    |
|-------------|----|----|
| <i>RFC1</i> |    |    |
| 6%          | 6% | 0% |

|             |     |     |             |    |    |
|-------------|-----|-----|-------------|----|----|
| <i>MLH1</i> |     |     | <i>PMS2</i> |    |    |
| 0%          | 28% | 17% | 0%          | 6% | 0% |
| <i>MSH2</i> |     |     | <i>MSH3</i> |    |    |
| 6%          | 22% | 0%  | 0%          | 6% | 6% |

|             |    |    |
|-------------|----|----|
| <i>RPA1</i> |    |    |
| 0%          | 6% | 6% |

|              |    |     |
|--------------|----|-----|
| <i>POLD1</i> |    |     |
| 0%           | 6% | 11% |

|             |     |     |             |    |    |
|-------------|-----|-----|-------------|----|----|
| <i>MLH1</i> |     |     | <i>MLH3</i> |    |    |
| 0%          | 28% | 17% | 11%         | 6% | 0% |
| <i>MSH2</i> |     |     | <i>MSH3</i> |    |    |
| 6%          | 22% | 0%  | 0%          | 6% | 6% |

|             |    |    |
|-------------|----|----|
| <i>LIG1</i> |    |    |
| 6%          | 0% | 6% |

**Mismatch repair**
