# Supplementary material for: Whole-exome sequencing of rectal neuroendocrine tumors
Source: PubMed Central journal article supplement (PMC10450454; doi:10.1530/erc-22-0257), 2023-08-02
Supplement: supplementary_table_3.pdf [file supplementary_table_3.pdf]

**Table S3** Gene alterations with potential correlation with the efficacy of immune checkpoint blockade.

| Gene          | Alteration    | Correlation |
|---------------|---------------|-------------|
| <i>ARID1A</i> | Inactivation  | Positive    |
| <i>CD274</i>  | Amplification | Positive    |
| <i>CDK12</i>  | Inactivation  | Positive    |
| <i>PBRM1</i>  | Inactivation  | Positive    |
| <i>MET</i>    | Amplification | Positive    |
| <i>POLD1</i>  | Inactivation  | Positive    |
| <i>POLE</i>   | Mutation      | Positive    |
| <i>FAT1</i>   | Mutation      | Positive    |
| <i>LRP1B</i>  | Mutation      | Positive    |
| <i>NOTCH1</i> | Mutation      | Positive    |
| <i>NOTCH2</i> | Mutation      | Positive    |
| <i>NOTCH3</i> | Mutation      | Positive    |
| <i>TERT</i>   | Mutation      | Positive    |
| <i>B2M</i>    | Inactivation  | Negative    |
| <i>CTNNB1</i> | Activation    | Negative    |
| <i>JAK1</i>   | Inactivation  | Negative    |
| <i>JAK2</i>   | Inactivation  | Negative    |
| <i>EGFR</i>   | Mutation      | Negative    |
| <i>ALK</i>    | Fusion        | Negative    |
| <i>KEAP1</i>  | Mutation      | Negative    |
| <i>PTEN</i>   | Inactivation  | Negative    |
| <i>STK11</i>  | Mutation      | Negative    |
| <i>SOCS1</i>  | Amplification | Negative    |
| <i>IFNGR1</i> | Inactivation  | Negative    |
| <i>IFNGR2</i> | Inactivation  | Negative    |
| <i>IRF1</i>   | Inactivation  | Negative    |
| <i>PIAS4</i>  | Inactivation  | Negative    |
| <i>CCND1</i>  | Amplification | HPD         |
| <i>FGF3</i>   | Amplification | HPD         |
| <i>FGF4</i>   | Amplification | HPD         |
| <i>FGF19</i>  | Amplification | HPD         |
| <i>MDM2</i>   | Amplification | HPD         |
| <i>DNMT3A</i> | Mutation      | HPD         |

Abbreviation: HPD: hyperprogression disease.
